# Supplementary material for: Catalytic activity of a new dioxidomolybdenum(vi) complex with a bipodal N2O-donor ligand in sulfur compound oxidation
Source: Royal Society of Chemistry journal article supplement (doi:10.1039/d2nj06227e), 2023-01-01
Supplement: d2nj06227e1.pdf [file d2nj06227e1.pdf]

## SUPPORT INFORMATION

**Table S1.** Summary of data collection and structure refinement.

|                                                                         |                                                                      |
|-------------------------------------------------------------------------|----------------------------------------------------------------------|
| Identification                                                          | $[(\text{MoO}_2)_2(\text{BPA})_2(\mu\text{-O})]$                     |
| Formula                                                                 | $\text{C}_{26}\text{H}_{26}\text{Mo}_2\text{N}_4\text{O}_7$          |
| Fw (g mol <sup>-1</sup> )                                               | 698.39                                                               |
| T (K)                                                                   | 291(2)                                                               |
| $\lambda$ (Å)                                                           | 0.71073                                                              |
| Crystal system                                                          | Monoclinic                                                           |
| Space group                                                             | $P2_1/n$                                                             |
| $a$ (Å)                                                                 | 11.7279(5)                                                           |
| $b$ (Å)                                                                 | 15.2529(5)                                                           |
| $c$ (Å)                                                                 | 14.7858(6)                                                           |
| $\alpha$ (°)                                                            | 90                                                                   |
| $\beta$ (°)                                                             | 90.9290(10)                                                          |
| $\gamma$ (°)                                                            | 90                                                                   |
| Volume (Å <sup>3</sup> )                                                | 2644.60(18)                                                          |
| Z                                                                       | 4                                                                    |
| $\rho_{\text{calc}}$ (Mg m <sup>-3</sup> )                              | 1.754                                                                |
| $\mu$ (mm <sup>-1</sup> )                                               | 1.001                                                                |
| F(000)                                                                  | 1400                                                                 |
| $\theta$ range(°)                                                       | 2.20-26.40                                                           |
| Index ranges                                                            | $-14 \leq h \leq 14$<br>$-19 \leq k \leq 19$<br>$-18 \leq l \leq 18$ |
| Data collected                                                          | 47048                                                                |
| Independent reflections                                                 | 5404                                                                 |
| $R_{\text{int}}$                                                        | 0.0273                                                               |
| Refinement method                                                       | Full matrix least squares on $F^2$                                   |
| Data / restraints / parameters                                          | 5404/2/360                                                           |
| GOF on $F^2$                                                            | 1.200                                                                |
| R1, wR2 [ $I > 2\sigma(I)$ ]                                            | 0.0289; 0.0681                                                       |
| R1, wR2 (all )                                                          | 0.0339; 0.0729                                                       |
| $\Delta\rho_{\text{max}}, \Delta\rho_{\text{min}}$ (e·Å <sup>-3</sup> ) | 0.729; -0.821                                                        |

## SUPPORT INFORMATION

Internal standart: anthracene solution at concentration  $2,5 \cdot 10^{-3}$  mol L<sup>-1</sup> in acetonitrile.

Standard solutions: Substrates (dibenzothiophene, diphenylsulfide and thioanisole) at concentrations showed at Table S2 in acetonitrile.

The injections at GC-MS were performed with mixture of 50  $\mu$ L of each standart solution of DBT, DPS and THIO and 450  $\mu$ L of internal standard solution.

**Table S2.** Substrate concentrations of standart solutions from analytical curves for sulfide quantification.

|   | Substrate concentration<br>(mol. L <sup>-1</sup> ) | Substrate<br>(%) |
|---|----------------------------------------------------|------------------|
| 1 | $7.00 \cdot 10^{-2}$                               | 100              |
| 2 | $5.25 \cdot 10^{-2}$                               | 75               |
| 3 | $3.50 \cdot 10^{-2}$                               | 50               |
| 4 | $1.75 \cdot 10^{-2}$                               | 25               |
| 5 | $7.00 \cdot 10^{-4}$                               | 1                |
| 6 | $7.00 \cdot 10^{-5}$                               | 0,1              |

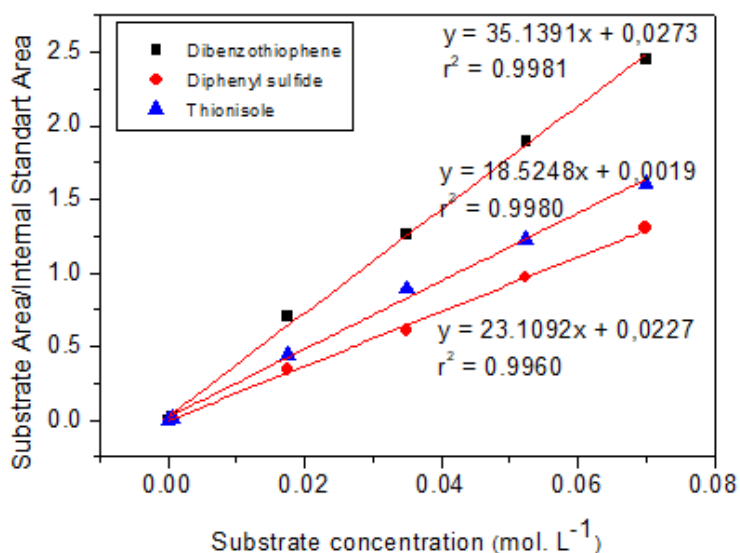

**Figure S1.** Calibration curves for quantification of sulfide conversion.

## SUPPORT INFORMATION

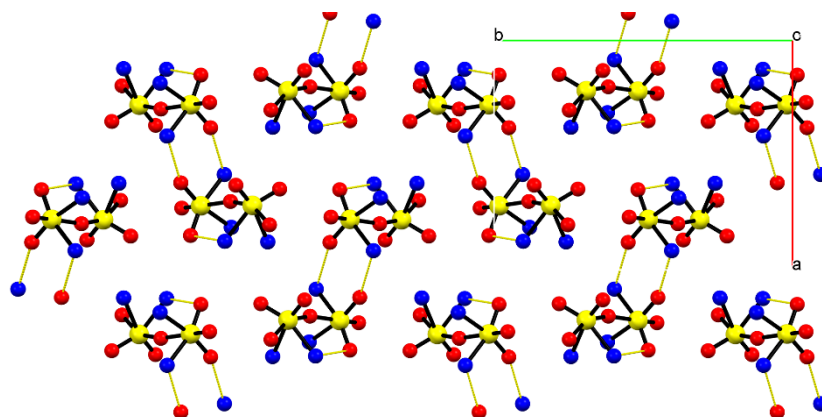

**Figure S2.** View of crystal packing along a direction evidencing intramolecular and intermolecular hydrogen bonds (yellow dashed line). Carbon and hydrogen atoms were omitted for clarity.

**Table S3.** Continuous shape measure values for  $[(\text{MoO}_2)_2(\text{BPA})_2(\mu\text{-O})]$ .

|     | Hexagon | Pentagonal pyramid | Octahedron   | Trigonal prism | Johnson pentagonal pyramid J2 |
|-----|---------|--------------------|--------------|----------------|-------------------------------|
| Mo1 | 31.815  | 29.013             | <b>0.903</b> | 16.010         | 32.247                        |
| Mo2 | 31.792  | 27.246             | <b>1.019</b> | 15.051         | 30.624                        |

## SUPPORT INFORMATION

**Table S4.** Comparison between calculated and crystal data bonding lengths of [(MoO<sub>2</sub>)<sub>2</sub>(BPA)<sub>2</sub>(μ-O)] complex.

| Bond       | Calculated (Å) | Experimental (Å) | Difference (%) |
|------------|----------------|------------------|----------------|
| Mo1-O1     | 1.92104        | 1.883(2)         | 2.02           |
| Mo1-O2     | 1.97792        | 1.988(2)         | -0.51          |
| Mo1-O3     | 1.76865        | 1.720(2)         | 2.83           |
| Mo1-O4     | 1.75754        | 1.700(2)         | 3.38           |
| Mo1-N1     | 2.37838        | 2.335(2)         | 1.86           |
| Mo1-N2     | 2.35036        | 2.356(2)         | -0.24          |
| Mo2-O1     | 1.93916        | 1.913(2)         | 1.37           |
| Mo2-O5     | 1.98649        | 1.981(2)         | 0.28           |
| Mo2-O6     | 1.75725        | 1.706(2)         | 3.00           |
| Mo2-O7     | 1.75868        | 1.703(2)         | 3.27           |
| Mo2-N3     | 2.35717        | 2.340(2)         | 0.73           |
| Mo2-N4     | 2.36714        | 2.363(2)         | 0.18           |
| O4-Mo1-O3  | 107.519        | 106.5(1)         | 0.96           |
| O4-Mo1-O1  | 97.6476        | 99.94(9)         | -2.29          |
| O3-Mo1-O1  | 96.66481       | 98.18(8)         | -1.54          |
| O4-Mo1-O2  | 96.1737        | 95.33(9)         | 0.89           |
| O3-Mo1-O2  | 98.88854       | 96.38(8)         | 2.60           |
| O1-Mo1-O2  | 155.00681      | 154.92(8)        | 0.06           |
| O4-Mo1-N1  | 89.91592       | 92.30(9)         | -2.58          |
| O3-Mo1-N1  | 162.42655      | 161.20(9)        | 0.76           |
| O1-Mo1-N1  | 78.37178       | 78.59(8)         | -0.28          |
| O2-Mo1-N1  | 80.93174       | 81.05(7)         | -0.15          |
| O4-Mo1-N2  | 161.22231      | 162.79(9)        | -0.96          |
| O3-Mo1-N2  | 91.09937       | 90.01(9)         | 1.21           |
| O1-Mo1-N2  | 82.18541       | 82.05(8)         | 0.17           |
| O2-Mo1-N2  | 78.08493       | 77.63(7)         | 0.59           |
| N1-Mo1-N2  | 71.59926       | 71.23(7)         | 0.52           |
| Mo1-O1-Mo2 | 152.34313      | 157.8(1)         | -3.46          |
| O7-Mo2-O6  | 108.25566      | 107.4(1)         | 0.80           |
| O7-Mo2-O1  | 95.99379       | 98.53(9)         | -2.57          |
| O6-Mo2-O1  | 100.14182      | 100.44(9)        | -0.30          |
| O7-Mo2-O5  | 93.12026       | 93.42(9)         | -0.32          |
| O6-Mo2-O5  | 96.48035       | 96.35(9)         | 0.14           |
| O1-Mo2-O5  | 157.45752      | 155.38(8)        | 1.34           |
| O7-Mo2-N3  | 94.2012        | 94.92(9)         | -0.76          |
| O6-Mo2-N3  | 157.01288      | 156.95(9)        | 0.04           |
| O1-Mo2-N3  | 81.82891       | 81.39(8)         | 0.54           |
| O5-Mo2-N3  | 76.96608       | 76.19(8)         | 1.02           |
| O7-Mo2-N4  | 165.26334      | 164.59(9)        | 0.41           |
| O6-Mo2-N4  | 86.3215        | 87.49(9)         | -1.34          |
| O1-Mo2-N4  | 83.16797       | 82.20(8)         | 1.18           |
| O5-Mo2-N4  | 82.81413       | 80.68(8)         | 2.65           |
| N3-Mo2-N4  | 71.09448       | 69.90(8)         | 1.71           |

## SUPPORT INFORMATION

**Table S5.** Calculated atomic Mulliken charges for  $[(\text{MoO}_2)_2(\text{BPA})_2(\mu\text{-O})]$  complex.

Atoms numbers correspond to the crystal structure data of Figure 2.

| Atom | Mulliken Charges |
|------|------------------|
| Mo1  | 1.284            |
| Mo2  | 1.242            |
| O1   | -0.766           |
| O2   | -0.563           |
| O3   | -0.567           |
| O4   | -0.500           |
| O5   | -0.548           |
| O6   | -0.522           |
| O7   | -0.486           |
| N1   | -0.469           |
| N2   | -0.273           |
| N3   | -0.520           |
| N4   | -0.273           |

## SUPPORT INFORMATION

**Table S6.** FITR mainly wavenumber bands ( $\text{cm}^{-1}$ ) in the vibration spectra of the HBPA ligand and  $[(\text{MoO}_2)_2(\text{BPA})_2(\mu\text{-O})]$ .

| HBPA             | Mo complex       | Group vibration                                                  |
|------------------|------------------|------------------------------------------------------------------|
| -                | 3438             | $\nu\text{O-H}$ (water)                                          |
| 3263             | 3236, 3176       | $\nu\text{N-H}$ (primary amine)                                  |
| 3039             | 3073             | $\nu\text{C-H}$ (aromatic)                                       |
| 2931             | 2913             | $\nu\text{C-H}$ (aliphatic, symmetrical)                         |
| 2859             | -                | $\nu\text{C-H}$ (aliphatic, unsymmetrical)                       |
| 1593, 1456, 1429 | 1605, 1480, 1448 | $\nu\text{C=C}$ , $\nu\text{C=N}$<br>(double bonds in aromatics) |
| 1356             | -                | $\delta\text{O-H}$ (phenol)                                      |
| -                | 1024             | $\nu\text{N-Mo}$                                                 |
| -                | 907              | $\nu\text{Mo=O}$ (dioxomolybdenum)                               |
| -                | 743, 759         | $\nu\text{Mo-O-Mo}$                                              |
|                  | 471              | $\nu\text{N-Mo}$                                                 |

### SUPPORT INFORMATION

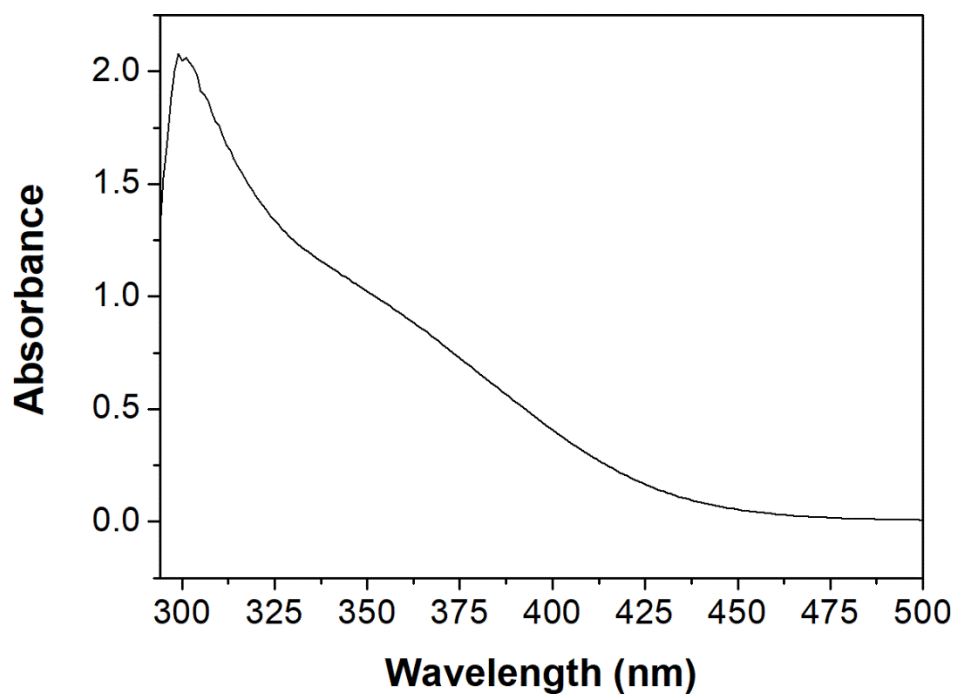

**Figure S3.** Electronic spectrum of Mo(VI) complex in DMSO solution of  $2.86 \times 10^{-4}$  mol/dm<sup>3</sup>.

## SUPPORT INFORMATION

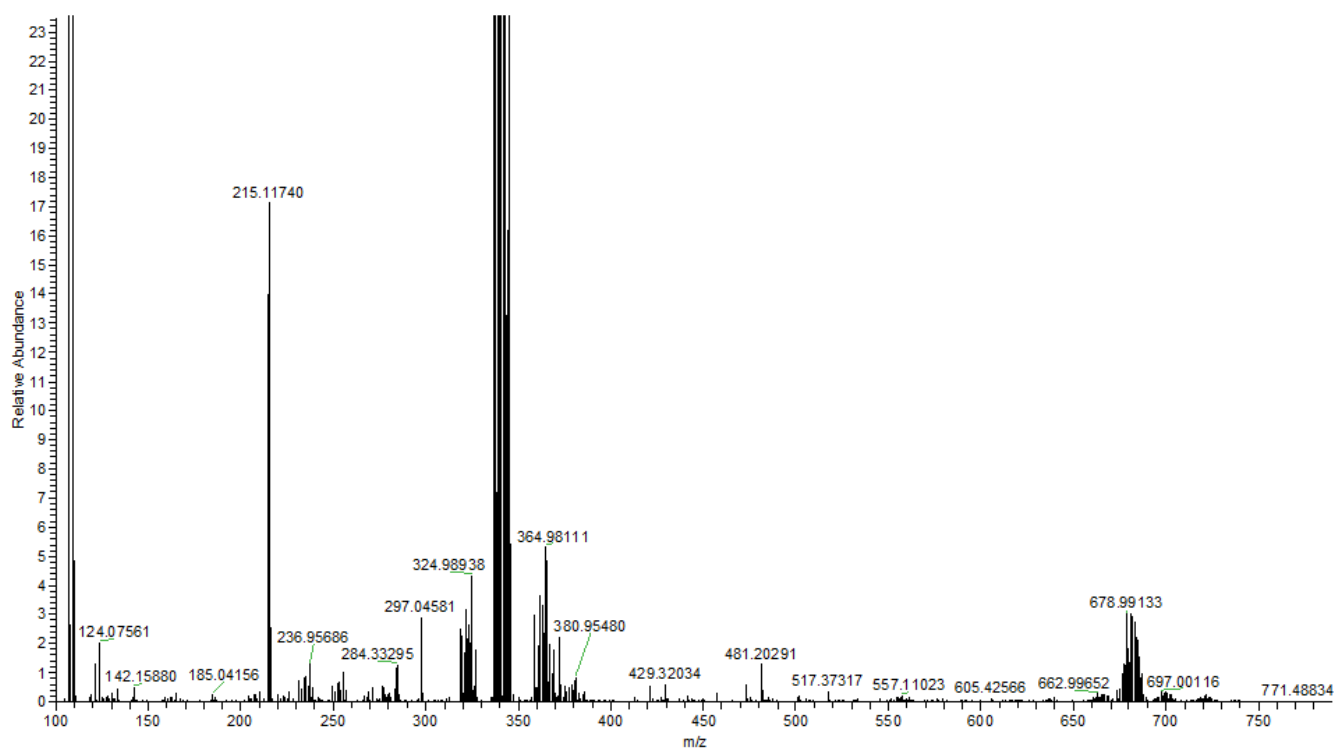

**Figure S4.** Experimental ESI-(+)-MS for  $[(\text{MoO}_2)_2(\text{BPA})_2(\mu\text{-O})]^+$  in methanol solution.



## SUPPORT INFORMATION

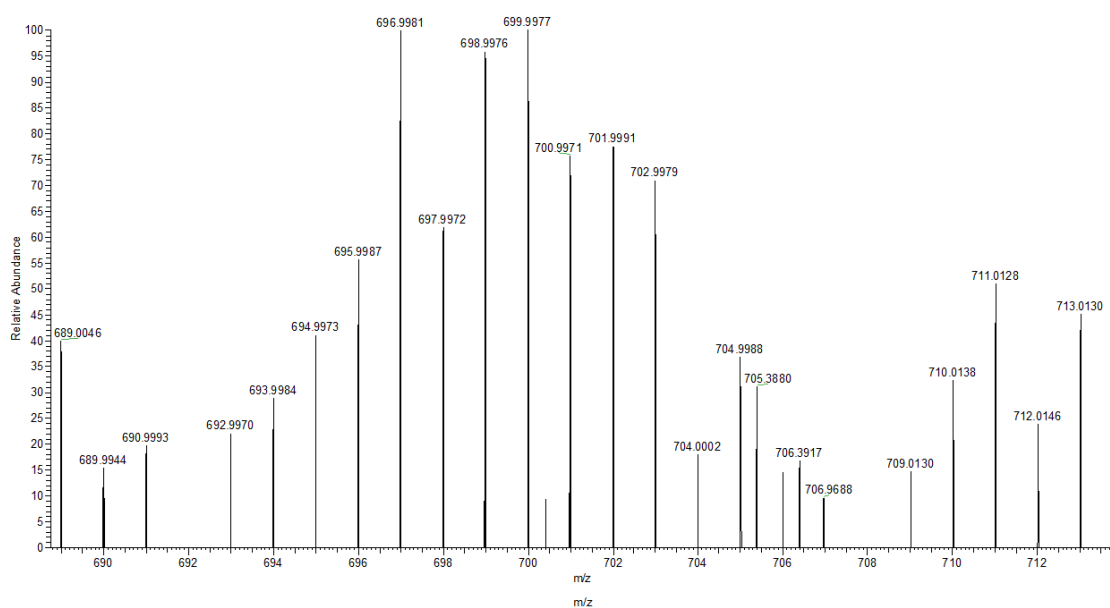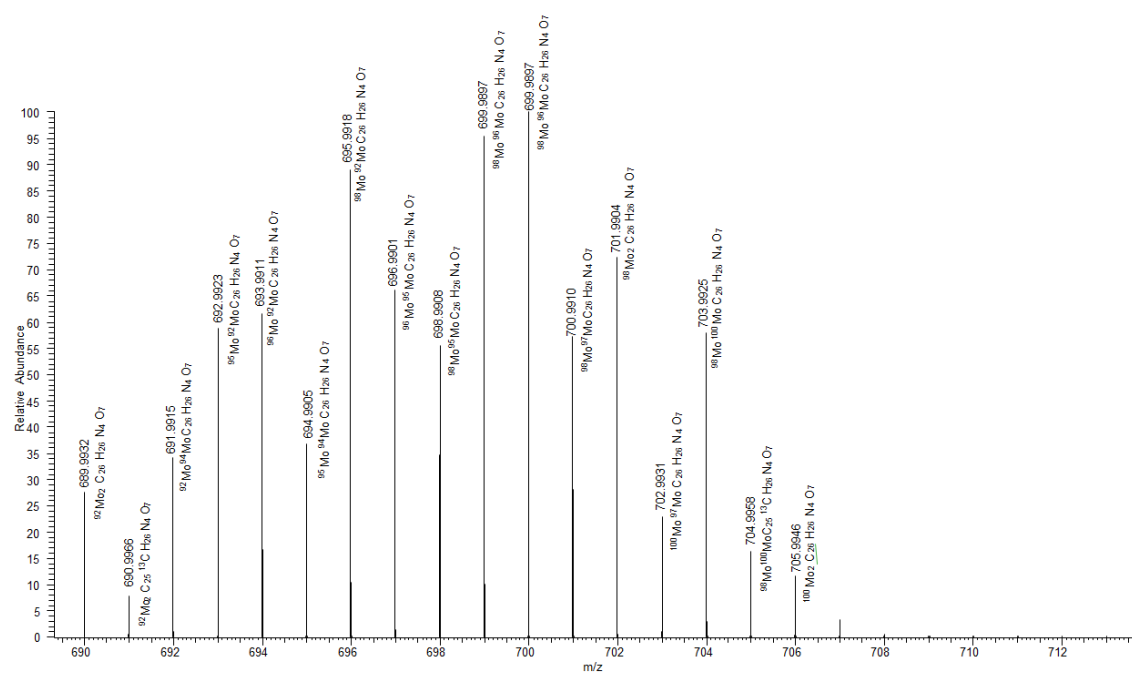

**Figure S5.** Experimental (top) and calculated (bottom) isotopic pattern for  $[(\text{MoO}_2)_2(\text{BPA})_2(\mu\text{-O})]^+$ .

## SUPPORT INFORMATION

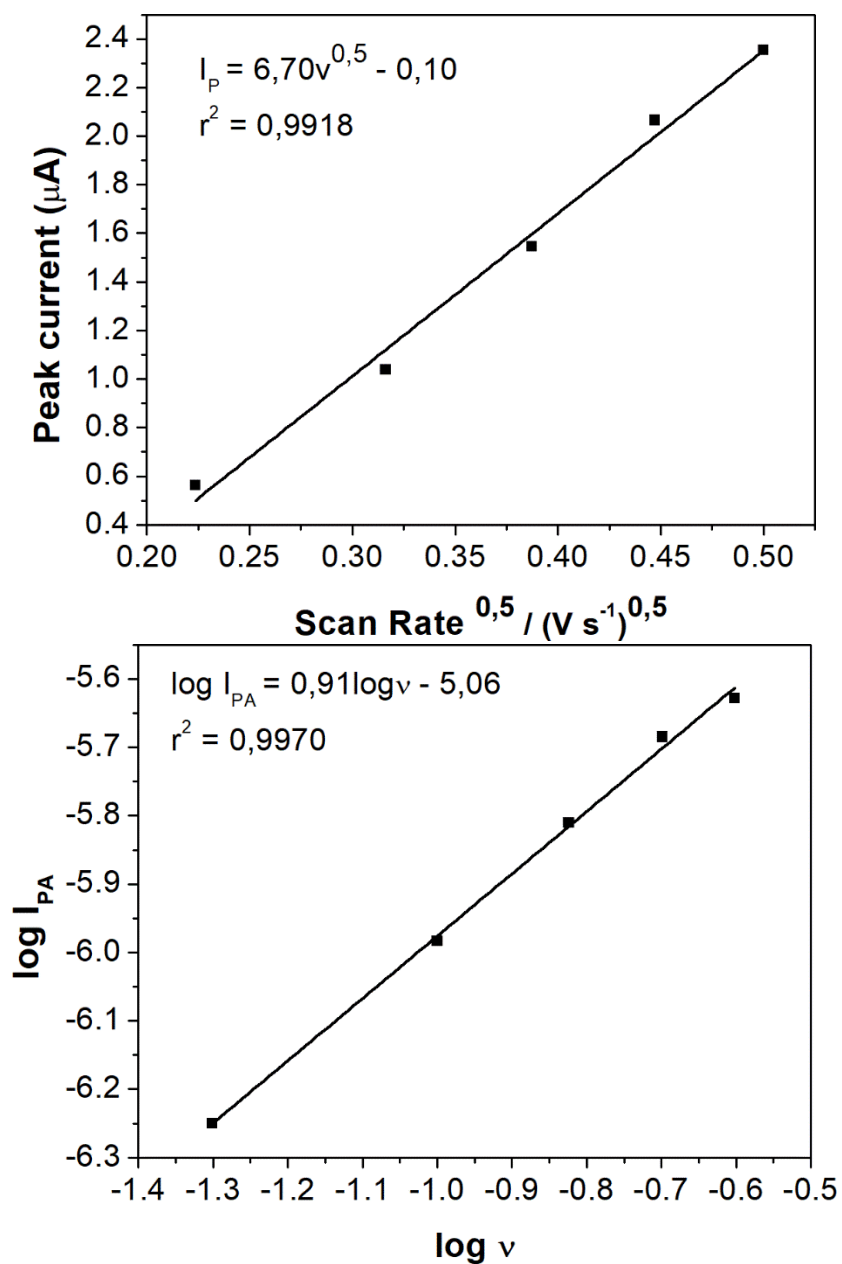

**Figure S6.** The linear dependence of  $I_{pa}$  vs.  $v^{1/2}$  of anodic peak ( $E_{a1}$ ) (top) and the linear relationship between the logarithm of  $I_{pa}$  and the logarithm of  $v$  (bottom).
